# Supplementary material
Source: MDPI journal article supplement (https://www.mdpi.com/2079-6412/13/2/313)
Supplement: s1 [file s1]

# Supplementary Materials: Bi-Phase $\text{NiCo}_2\text{S}_4\text{-NiS}_2/\text{CFP}$ Nanocomposites as a Highly Active Catalyst for Oxygen Evolution Reaction

Jintang Li \*, Yongji Xia, Xianrui Luo, Tianle Mao, Zhenjia Wang, Zheyu Hong and Guanghui Yue \*

College of Materials, Xiamen University, Xiamen 361005, China

\* Correspondence: leejt@xmu.edu.cn (J.L.), yuegh@xmu.edu.cn (G.Y.)

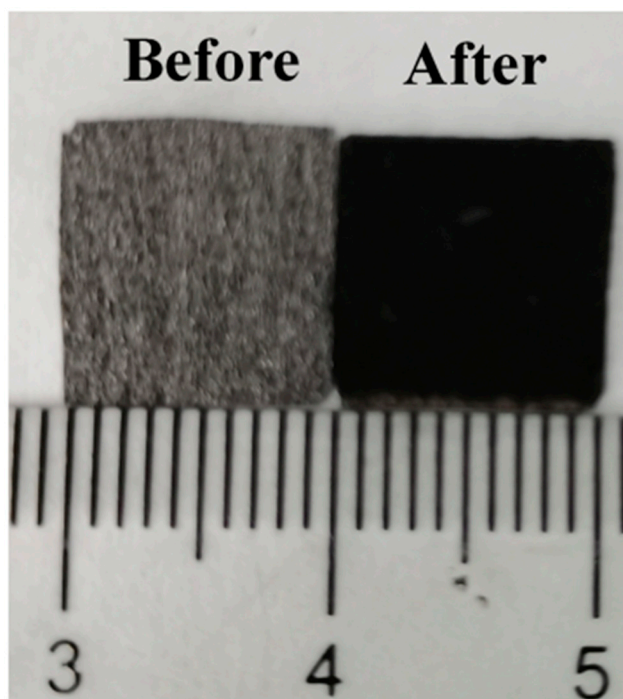

**Figure S1.** The surface change after as prepared  $\text{NiCo}_2\text{S}_4\text{-NiS}_2$  anchored on the surface of CFP.

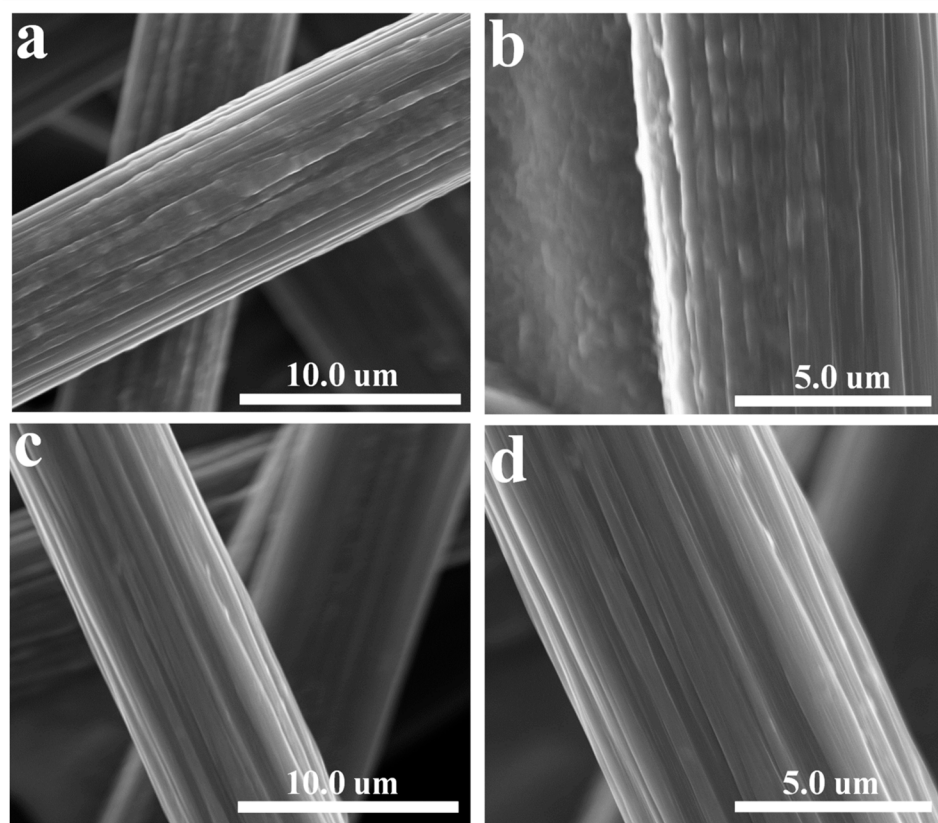

**Figure S2.** Low-magnification SEM images of (a) CFP and (c) OCFP. High-magnification SEM images of (b) CFP and (d) OCFP.

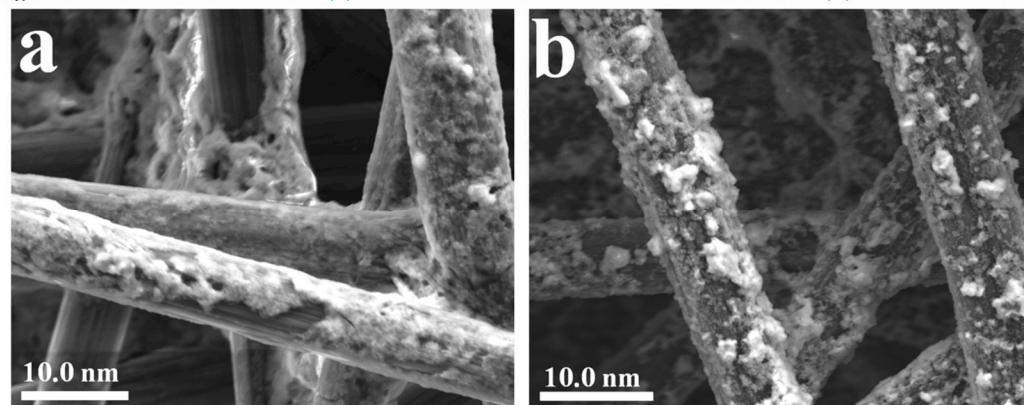

**Figure S3.** The morphologies of (a) Ni<sub>3</sub>S<sub>4</sub>-NiS<sub>2</sub>/CFP and (b) CoS<sub>2</sub>/CFP.

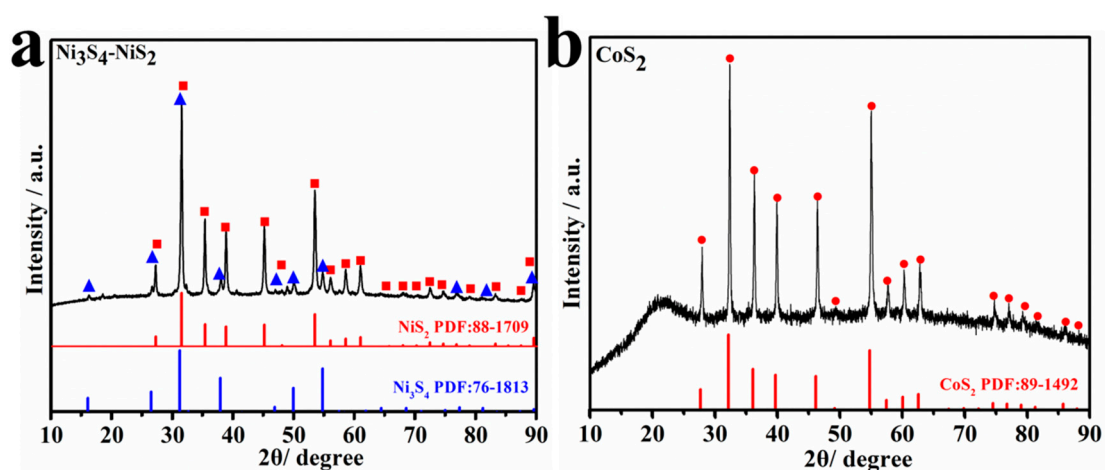

Figure S4. XRD patterns of (a)  $\text{Ni}_3\text{S}_4\text{-NiS}_2$  and (b)  $\text{CoS}_2$ .

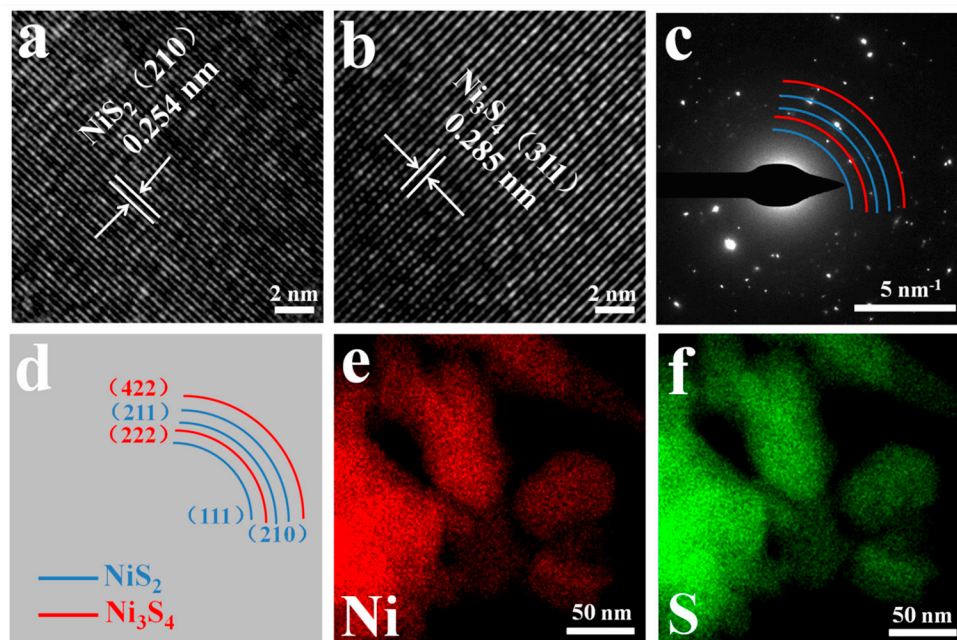

Figure S5. (a),(b) HRTEM image of  $\text{Ni}_3\text{S}_4\text{-NiS}_2$ . (c),(d) Selected area electron diffraction (SAED) diffraction ring of  $\text{Ni}_3\text{S}_4\text{-NiS}_2$ . (e),(f) The area chosen to do EDX elemental mapping and the corresponding EDX elemental mapping images for Ni and S respectively.

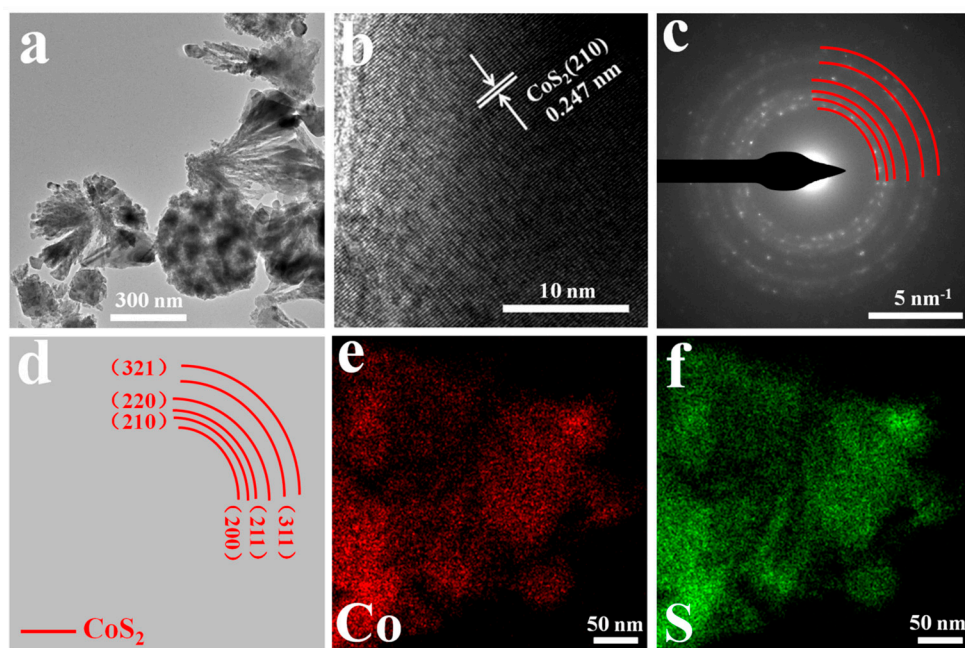

**Figure S6.** (a) The TEM image of CoS<sub>2</sub>. (b) HRTEM image of CoS<sub>2</sub>. (c),(d) Selected area electron diffraction (SAED) diffraction ring of CoS<sub>2</sub>. (e),(f) The area chosen to do EDX elemental mapping and the corresponding EDX elemental mapping images for Co and S respectively.

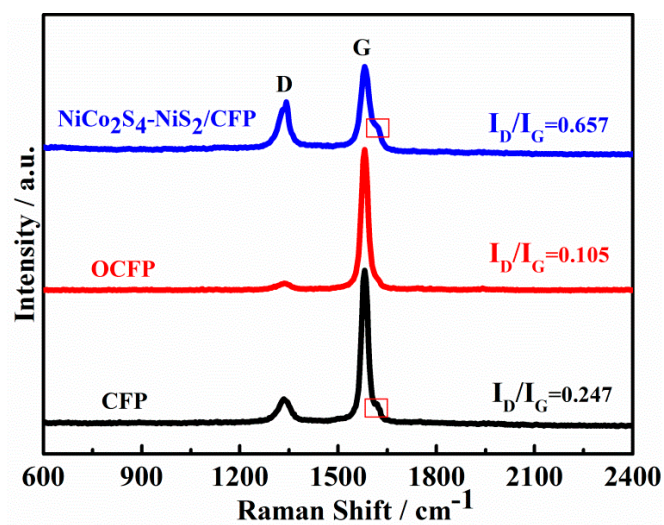

**Figure S7.** Raman spectra of CFP, OCFP and NiCo<sub>2</sub>S<sub>4</sub>-NiS<sub>2</sub>/CFP.

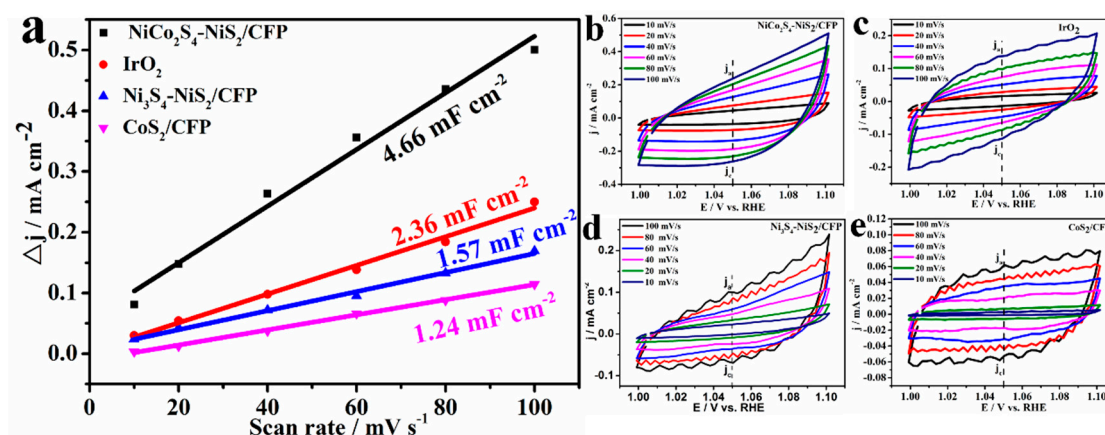

Figure S8. Double-layer capacitances (a) and CV scans at different scan rates (b–e).

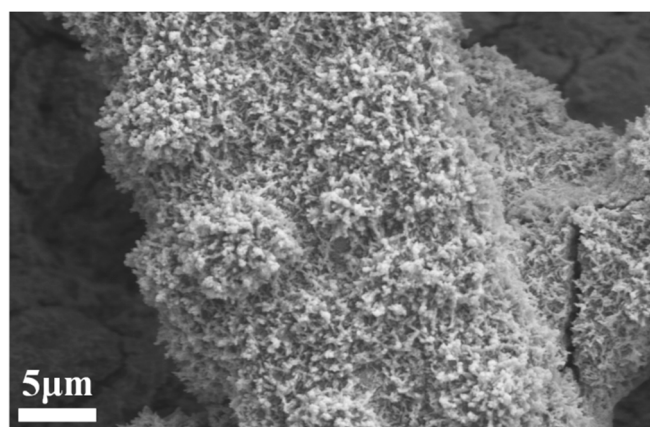

Figure S9. The morphology of  $\text{NiCo}_2\text{S}_4\text{-NiS}_2/\text{CFP}$  after 12 h durability test.

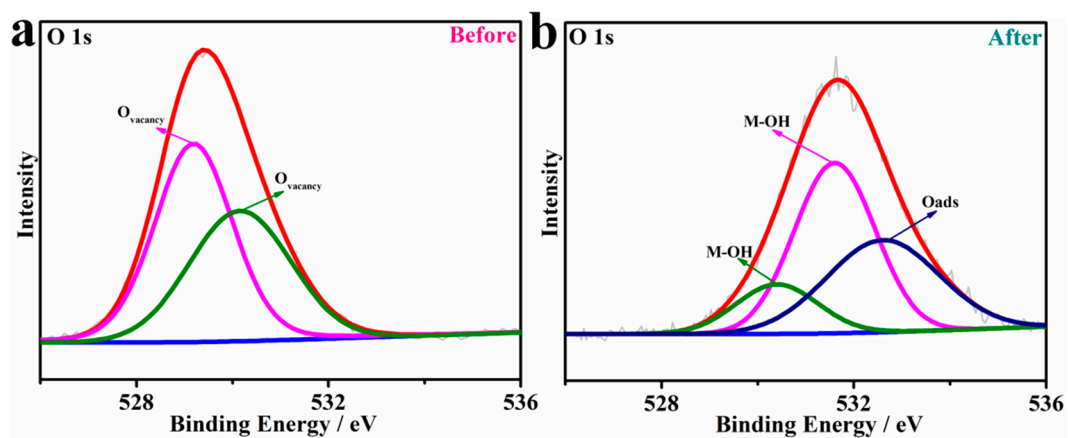

Figure S10. The O XPS spectra of as-prepared catalyst before (a) and after (b) 12 h durability test.

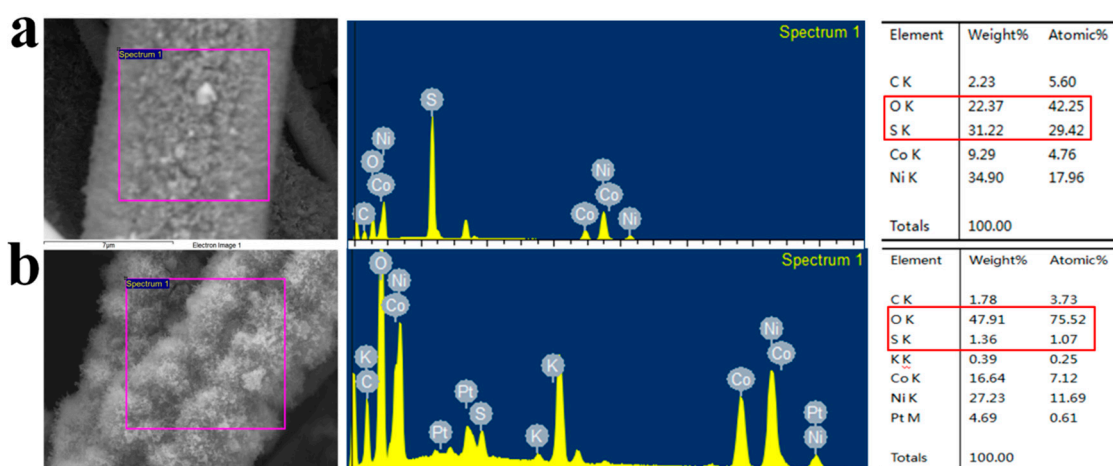

**Figure S11.** The EDS results of NiCo<sub>2</sub>S<sub>4</sub>-NiS<sub>2</sub>/CFP (a) before 12 h durability test. (b) After 12 h durability test.

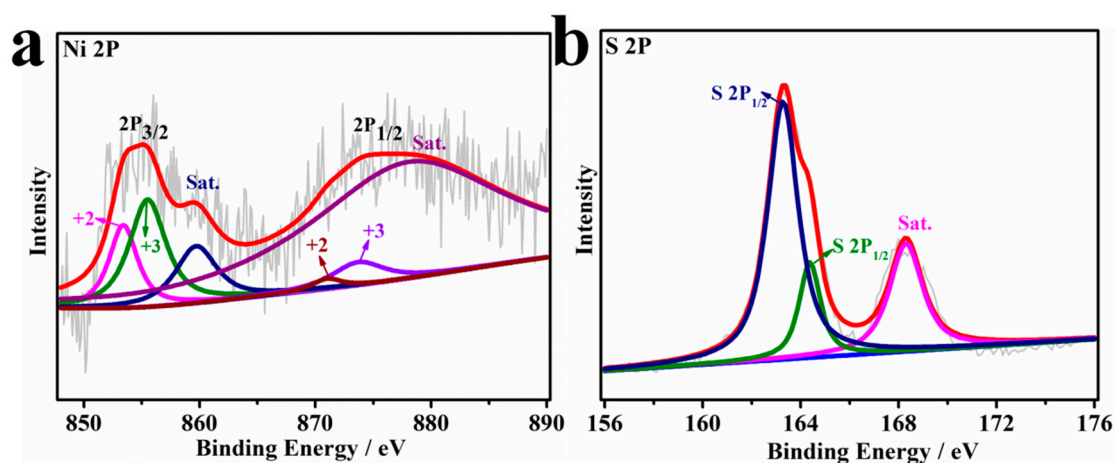

**Figure S12.** The XPS spectra of (a) Ni 2p, (b) S 2p in Ni<sub>3</sub>S<sub>4</sub>-NiS<sub>2</sub>/CFP.

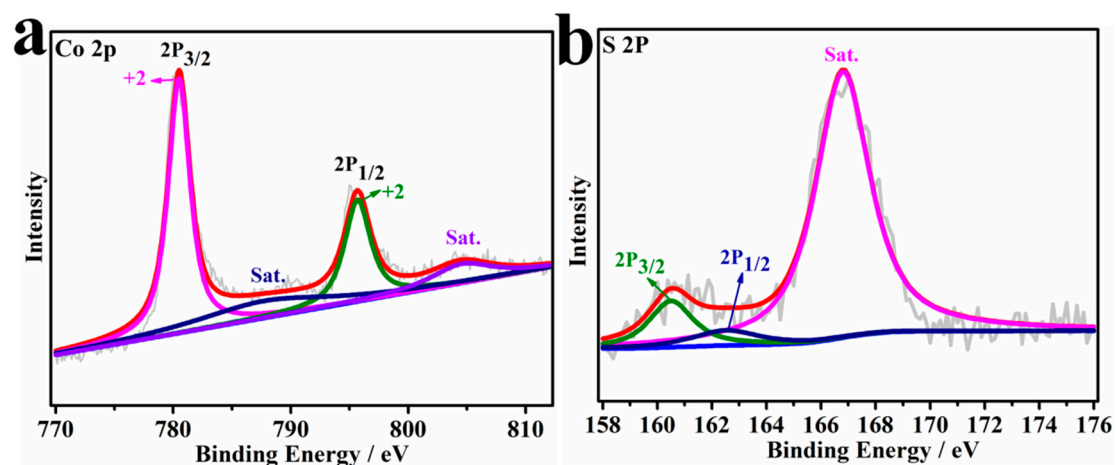

**Figure S13.** The XPS spectra of (a) Co 2p, (b) S 2p in CoS<sub>2</sub>/CFP.

**Table S1.** Comparison of OER activity of NiCo<sub>2</sub>S<sub>4</sub>-NiS<sub>2</sub>/CFP with that of most reported nickel-cobalt sulfide catalysts tested in alkaline solution.

| Catalysts                                               | E <sub>10</sub><br>(V vs. RHE) | Tafel slope b<br>(mV/dec) | Reference |
|---------------------------------------------------------|--------------------------------|---------------------------|-----------|
| NiCo <sub>2</sub> S <sub>4</sub> -NiS <sub>2</sub> /CFP | 1.395                          | 81.54                     | This work |

|                                                                            |                                |       |           |
|----------------------------------------------------------------------------|--------------------------------|-------|-----------|
| Ni <sub>3</sub> S <sub>4</sub> -NiS <sub>2</sub> /CFP                      | 1.485                          | 179.2 | This work |
| Ni-Fe-Co-S NSs/NNCs                                                        | 1.437                          | 63    | [1]       |
| Co <sub>x</sub> Ni <sub>1-x</sub> S <sub>2</sub>                           | 1.52                           | 46    | [2]       |
| NCT-NiCo <sub>2</sub> S <sub>4</sub>                                       | 1.56 (100 mA/cm <sup>2</sup> ) | 86.8  | [3]       |
| NiCoDH/NiCoS                                                               | 1.533 (20 mA/cm <sup>2</sup> ) | 77.6  | [4]       |
| NiCoS/Ti <sub>3</sub> C <sub>2</sub> T <sub>x</sub>                        | 1.595                          | 58.2  | [5]       |
| Ni <sub>4.3</sub> Co <sub>4.7</sub> S <sub>8</sub>                         | 1.378                          | 90    | [6]       |
| H-3DRG@NiCo-LDH                                                            | 1.519                          | 80.3  | [7]       |
| H-3DRG@NiCo <sub>2</sub> S <sub>4</sub>                                    | 1.494                          | 93.5  | [7]       |
| Co <sub>1.22</sub> Ni <sub>0.78</sub> P <sub>2</sub> O <sub>7</sub> -C/RGO | 1.513                          | 51    | [8]       |
| NiCoS-3                                                                    | 1.55                           | 58.8  | [9]       |
| NiCo <sub>2</sub> S <sub>4</sub>                                           | 1.567                          | 64    | [10]      |

E<sub>10</sub> is the potential to reach 10mA cm<sup>-2</sup> for OER.

## References

1. Darband G. B.; Aliofkhazraei M.; Hyun S.; Rouhaghdam A. S.; Shanmugam S. Electrodeposition of Ni-Co-Fe mixed sulfide ultrathin nanosheets on Ni nanocones: a low-cost, durable and high performance catalyst for electrochemical water splitting. *Nanoscale* 2019, 11, 16621-16634.
2. Hong Y.R.; Mhin S.; Kim K.M.; Han W.S.; Choi H.; Ali G.; Chung K. Y.; Lee H. J.; Moon S.I.; Dutta S.; et al. Electrochemically activated cobalt nickel sulfide for an efficient oxygen evolution reaction: partial amorphization and phase control. *J. Mater. Chem. A* 2019, 7, 3592-3602.
3. Li F.; Xu R.; Li Y.; Liang F.; Zhang D.; Fu W.F.; Lv X.J. N-doped carbon coated NiCo<sub>2</sub>S<sub>4</sub> hollow nanotube as bifunctional electrocatalyst for overall water splitting. *Carbon* 2019, 145, 521-528.
4. Zhao H.; Yang Y.; Dai X.; Qiao H.; Yong J.; Luan X.; Yu L.; Luan C.; Wang Y.; Zhang X. NiCo-DH nanodots anchored on amorphous NiCo-Sulfide sheets as efficient electrocatalysts for oxygen evolution reaction. *Electrochim. Acta* 2019, 295, 1085-1092.
5. Zou H.; He B.; Kuang P.; Yu J.; Fan K. Metal-Organic Framework-Derived Nickel-Cobalt Sulfide on Ultrathin Mxene Nanosheets for Electrocatalytic Oxygen Evolution. *ACS Appl. Mater. Interfaces* 2018, 10, 22311-22319.
6. Tang Y.; Yang H.; Sun J.; Xia M.; Guo W.; Yu L.; Yan J.; Zheng J.; Chang L.; Gao F. Phase-pure Pentlandite Ni<sub>4.3</sub>Co<sub>4.7</sub>S<sub>8</sub> Binary Sulfide as Efficient Bifunctional Electrocatalyst for Oxygen Evolution and Hydrogen Evolution. *Nanoscale* 2018, 10, 10459-10466.
7. Qin K.; Wang L.; Wen S.; Diao L.; Liu P.; Li J.; Ma L.; Shi C.; Zhong C.; Hu W.; et al. Designed synthesis of NiCo-LDH and derived sulfide on heteroatom-doped edge-enriched 3D rivet graphene films for high-performance asymmetric supercapacitor and efficient OER. *J. Mater. Chem. A* 2018, 6, 8109-8119.
8. Zhao C.; Li P.; Shao D.; Zhang R.; Wang S.; Zhu Z.; Zhao C. Phytic acid-derived Co<sub>2</sub>-xNi<sub>x</sub>P<sub>2</sub>O<sub>7</sub>-C/RGO and its superior OER electrocatalytic performance. *Int. J. Hydrog. Energy* 2019, 44, 844-852.
9. Yu Z.; Bai Y.; Zhang S.; Liu Y.; Zhang N.; Sun K. MOF-directed templating synthesis of hollow nickel-cobalt sulfide with enhanced electrocatalytic activity for oxygen evolution. *Int. J. Hydrog. Energy* 2018, 43, 8815-8823.
10. Jiang J.; Yan C.; Zhao X.; Luo H.; Xue Z.; Mu T. A PEGylated deep eutectic solvent for controllable solvothermal synthesis of porous NiCo<sub>2</sub>S<sub>4</sub> for efficient oxygen evolution reaction. *Green Chem.* 2017, 19, 3023-3031.
